# Supplementary material for: Genome-wide investigation identifies a rare copy-number variant burden associated with human spina bifida
Source: PubMed Central journal article supplement (PMC8257499; doi:10.1038/s41436-021-01126-9), 2021-03-08
Supplement: 41436_2021_1126_MOESM1_ESM.pdf [file 41436_2021_1126_MOESM1_ESM.pdf]

| Gene Symbol | Chromosome | CNV Start | CNV End   | CNV Size (bp) | CNV Type | Gene region           | Role / Function                                                                                                                          |
|-------------|------------|-----------|-----------|---------------|----------|-----------------------|------------------------------------------------------------------------------------------------------------------------------------------|
| DMGDH       | 5          | 79016771  | 79027799  | 11028         | DEL      | intron12-<br>intron14 | mitochondrial catabolism of choline; catalyzes the oxidative demethylation of dimethylglycine to form sarcosine                          |
| FOXRED1     | 11         | 126269114 | 126271073 | 1959          | DEL      | exon1-intron1         | encodes a mitochondrial protein that contains a FAD-dependent oxidoreductase domain                                                      |
| SH3GL3      | 15         | 83447969  | 83496803  | 48834         | DEL      | intron1-intron2       | CNS development, signal transduction, clathrin mediated endocytosis; associated with congenital cerebellar ataxia and Huntington disease |
| PARD3       | 10         | 34811101  | 34955900  | 144799        | DUP      | txStart-intron1       | asymmetrical cell division and polarized cell growth (known NTD risk gene)                                                               |
| PGGT1B      | 5          | 115224330 | 115232674 | 8344          | DEL      | intron5-intron6       | motor neuron axon outgrowth; interacts with RHOB and CDC42                                                                               |
| SLC44A2     | 19         | 10620876  | 10626102  | 5226          | DEL      | txStart-intron1       | dietary choline transporter to synthesize betaine                                                                                        |
| VAV2        | 9          | 133990725 | 134020294 | 29569         | DUP      | txStart-intron1       | signal transduction; several roles in cytoskeletal and actin dynamics; expressed in most tissues                                         |
| DOCK10      | 2          | 225033901 | 225042300 | 8399          | DEL      | exon1-intron1         | guanosine nucleotide exchange factors for Rho GTPases; interacts with CDC42                                                              |

**Supplementary Table 1. Rare, gene disrupting CNVs present only in cases that have potential for biological significance for neurulation.** Shown are genic location of the CNV and known biological function of the gene disrupted.

| Primers          | Sequence (5' to 3')  | Size of amplicon |
|------------------|----------------------|------------------|
| <i>DMGDH</i> -F  | CAGGGAGGCACATCAAAAA  | 151 bp           |
| <i>DMGDH</i> -R  | TCCAGACTCACAGGCTCTGA |                  |
| <i>SH3GL3</i> -F | GGACCATGGCAAAGTGGAT  | 152 bp           |
| <i>SH3GL3</i> -R | GACTCGTAAACCCTGGGGAT |                  |
| <i>PARD3</i> -F  | ACTGCAGAGAAAGCCTTGGT | 130 bp           |
| <i>PARD3</i> -R  | CACACTTTTCCCCACCAGAT |                  |
| <i>DOCK10</i> -F | GGGAAATTCAAGAGCCCAAT | 136 bp           |
| <i>DOCK10</i> -R | TCCAGACTCACAGGCTCTGA |                  |

**Supplementary Table 2. List of gene-specific primers used for qPCR.**

| Chromosome<br>(chr) | Start<br>Position | End<br>Position | CNV Size<br>(bp) | CNV<br>Type | NDD Cohort<br>Overlap |
|---------------------|-------------------|-----------------|------------------|-------------|-----------------------|
| chr2                | 47161001          | 47363000        | 202000           | DUP         |                       |
| chr2                | 212520978         | 212598541       | 77563            | DUP         |                       |
| chr5                | 58964501          | 59009100        | 44599            | DUP         |                       |
| chr5                | 129407112         | 129601002       | 193890           | DUP         | ASD                   |
| chr5                | 240783            | 607807          | 367024           | DUP         | ADHD, ASD, OCD, SCZ*  |
| chr5                | 66078401          | 66079900        | 1499             | DUP         |                       |
| chr6                | 38597553          | 38605072        | 7540             | DEL         |                       |
| chr7                | 6423456           | 6605006         | 181551           | DEL         | ASD                   |
| chr7                | 70769343          | 71410241        | 640898           | DUP         | ADHD, ASD*, SCZ       |
| chr8                | 99101150          | 99103517        | 2320             | DEL         |                       |
| chr9                | 133990725         | 134020294       | 29569            | DUP         | ASD                   |
| chr10               | 99317001          | 100480000       | 1.16E+06         | DUP         | ASD                   |
| chr10               | 34811101          | 34955900        | 144799           | DUP         | ADHD, ASD             |
| chr11               | 31514249          | 31534087        | 19838            | DEL         | ASD                   |
| chr12               | 110607001         | 110741000       | 134000           | DUP         |                       |
| chr12               | 79721001          | 79828000        | 107000           | DUP         |                       |
| chr13               | 19177560          | 19197244        | 19684            | DEL         |                       |
| chr14               | 36672883          | 37212020        | 539138           | DEL         | ASD                   |
| chr15               | 67196115          | 67462384        | 266269           | DEL         | ASD, OCD              |
| chr16               | 83165419          | 83188058        | 22654            | DEL         |                       |
| chr16               | 76464757          | 76728295        | 263538           | DUP         | ASD, OCD              |
| chr18               | 79439001          | 79542000        | 103000           | DUP         | ASD*                  |
| chr18               | 55612876          | 55758301        | 145426           | DEL         | ASD, SCZ              |
| chr18               | 41512637          | 42123625        | 610988           | DUP         | ADHD, ASD             |
| chr19               | 4155994           | 4166977         | 10983            | DUP         |                       |
| chr19               | 3121001           | 3124100         | 3099             | DUP         |                       |
| chr19               | 4524505           | 4545286         | 20781            | DEL         |                       |
| chr20               | 25491469          | 25493839        | 2349             | DEL         | ASD                   |
| chrX                | 154881001         | 155372000       | 491000           | DUP         | ADHD*, ASD, OCD, SCZ  |
| chrX                | 1096026           | 1382360         | 286334           | DUP         |                       |
| chrX                | 6535001           | 8169000         | 1.63E+06         | DUP         | ADHD*, ASD, OCD*, SCZ |
| chrX                | 8627001           | 8738000         | 111000           | DUP         | ADHD, ASD, OCD        |
| chrX                | 31743206          | 31848338        | 105133           | DEL         | ADHD, ASD             |

**Supplementary Table 3. Partial list of rare exon disruptive CNVs in this study.** Shown are detected rare CNVs that impact either established NTD pathways shared by both Qatar and US cohorts (highlighted in Fig. 5a) or that overlap established human neurodevelopmental disorder (NDD) genes. Variants are shown by chromosomal location, size and type. NDD cohort overlap specifies the neurodevelopmental disorder in which the rare coding CNV found in our SB cases overlaps with a CNV detected in a NDD cohort (Zarrei et al., 2019, NPJ Genomic Medicine, 4:26). \* signifies that the CNV from our study overlaps a NDD CNV previously deemed to be clinically relevant by ACMG guidelines. ADHD=attention deficit hyperactivity disorder; ASD=autism spectrum disorder; OCD=obsessive compulsive disorder; SCZ=schizophrenia.

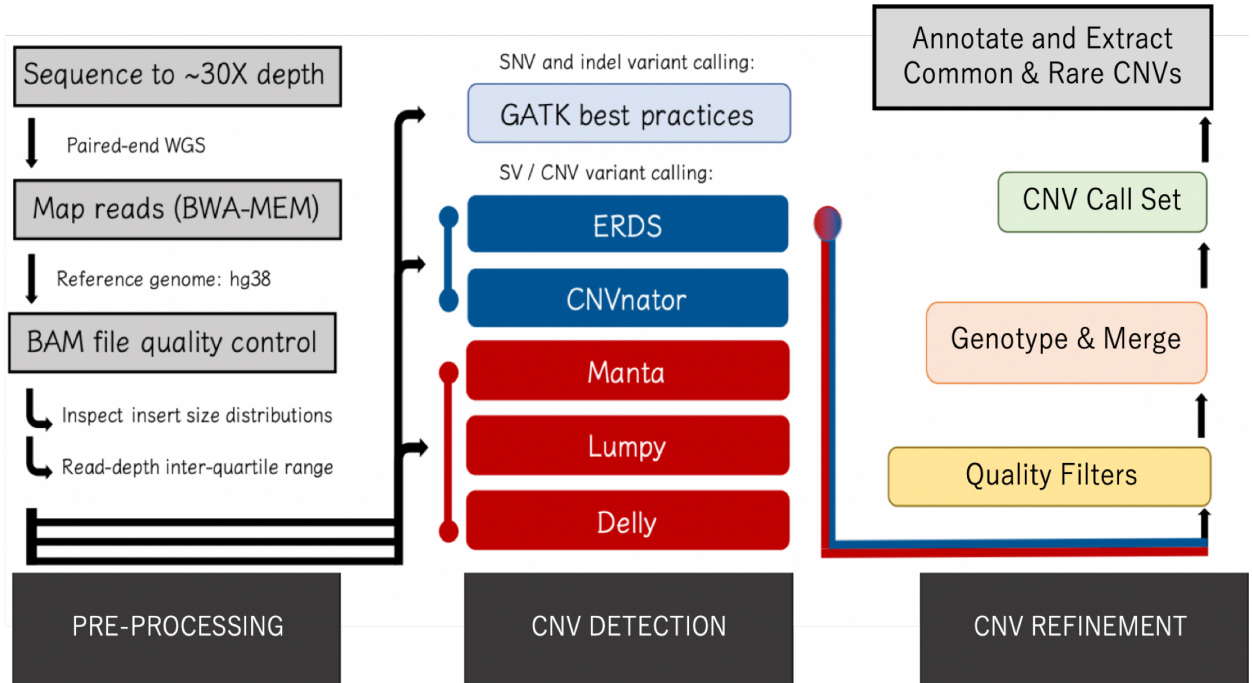

**Supplementary Figure 1. Workflow schematic for CNV detection in our spina bifida cohorts.** Pre-processing, CNV detection and call refinement are core components of the computational methodology in our study to obtain high-quality CNVs from WGS data. For the ensemble approach used for CNV detection, the evidence from read depth information is incorporated using the algorithms in blue (ERDS and CNVnator) and the split-read and read pair evidence is integrated using the algorithms in red (Manta, Lumpy and Delly).

### HG002 deletions accuracy benchmark

- HG002 genome 2x250bp Illumina sequencing
- Downsampled to 30X depth
- Consensus of  $\geq 2$  methods detect CNV (50% reciprocal overlap, breakpoint distance  $\leq 2$ kb)
- Call set > 300bp

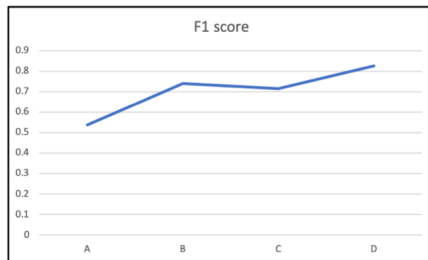

### Simulated duplications accuracy benchmark

- Simulated tandem duplications across 30X whole genome
- Size ranges from 300bp to 1Mb
- Consensus of  $\geq 2$  methods detect CNV (50% reciprocal overlap, breakpoint distance  $\leq 2$ kb)
- Call set > 300bp

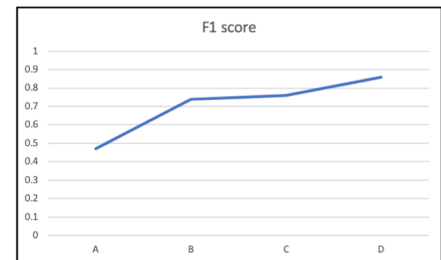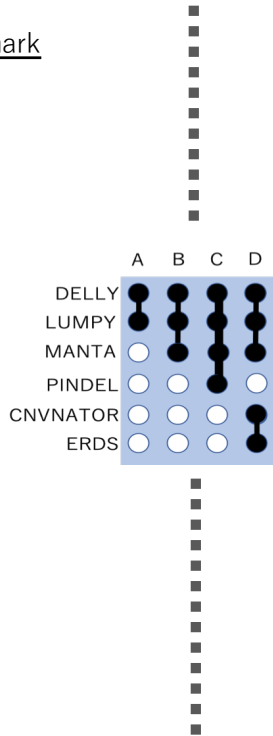

**Supplementary Figure 2. Benchmark and comparison testing for several ensemble approaches for CNV detection on real (HG002) and simulated (30X) genomes.** CNV detection accuracy was measured using 50% reciprocal overlap.

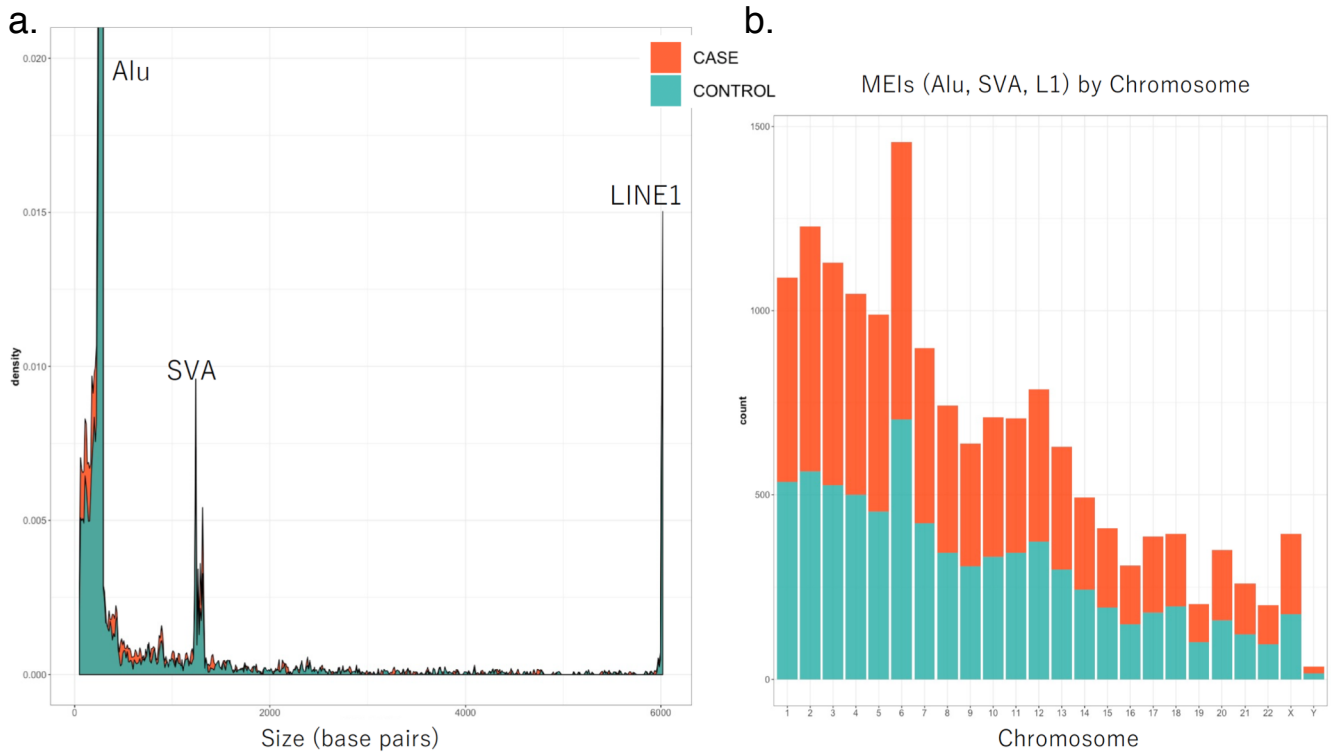

**Supplementary Figure 3. Characteristics of mobile element insertions (MEIs) observed in our US spina bifida cohort.** (a) Density plots of MEIs (Alu, SVA and L1) detected in US cases and controls. (b) Counts of Alu, SVA and L1 elements per chromosome for US cases and controls.

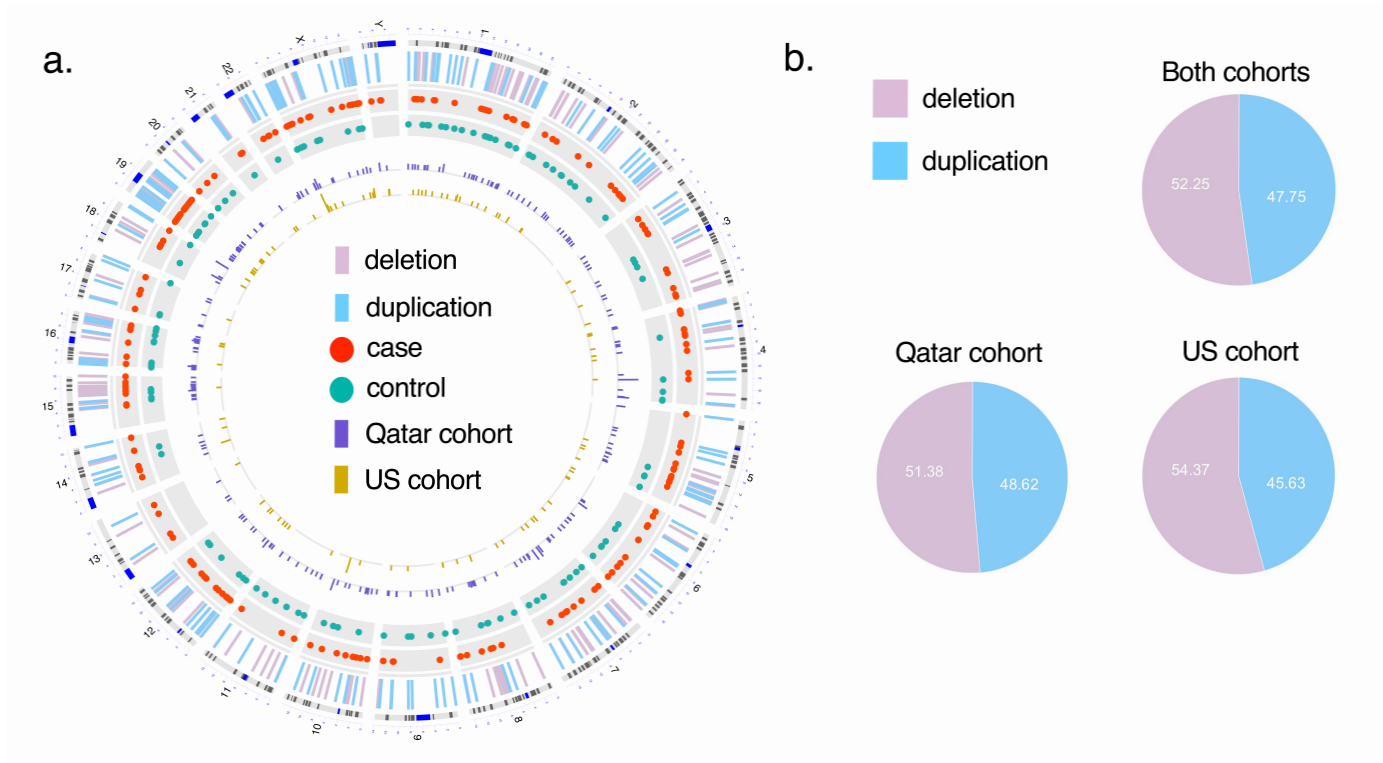

**Supplementary Figure 4. Rare coding CNV chromosomal locations and comparison of genetic losses and gains in each cohort.** (a) Circos plot depicting chromosomal locations of rare coding CNVs detected in each population cohort by case status. (b) Proportions of rare coding deletions (pink) and duplications (blue) in each population cohort were consistent.

## Over-representation analysis of genes affected by rare coding CNVs

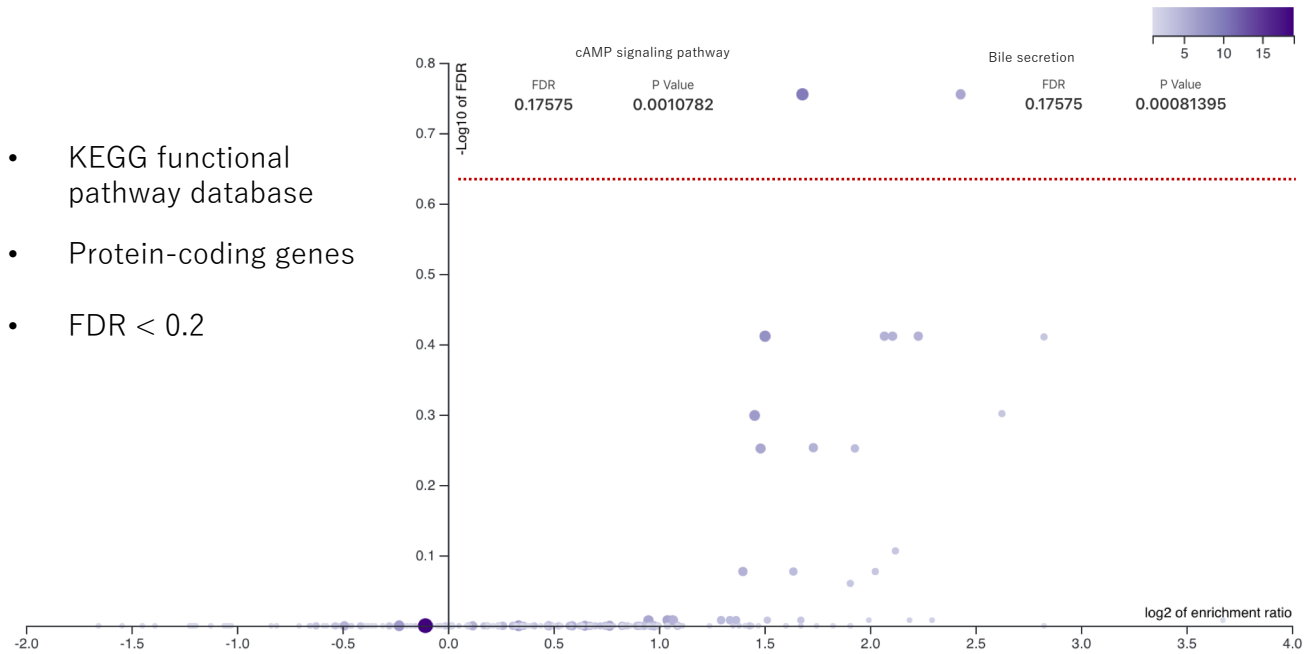

**Supplementary Figure 5. Over-representation analysis of the protein-coding genes affected by rare coding CNVs in SB cases in the study.** Two pathways using the KEGG functional pathway databases are significantly enriched when screened for a false discovery rate (FDR) under 0.2 (cAMP signaling pathway and bile secretion).



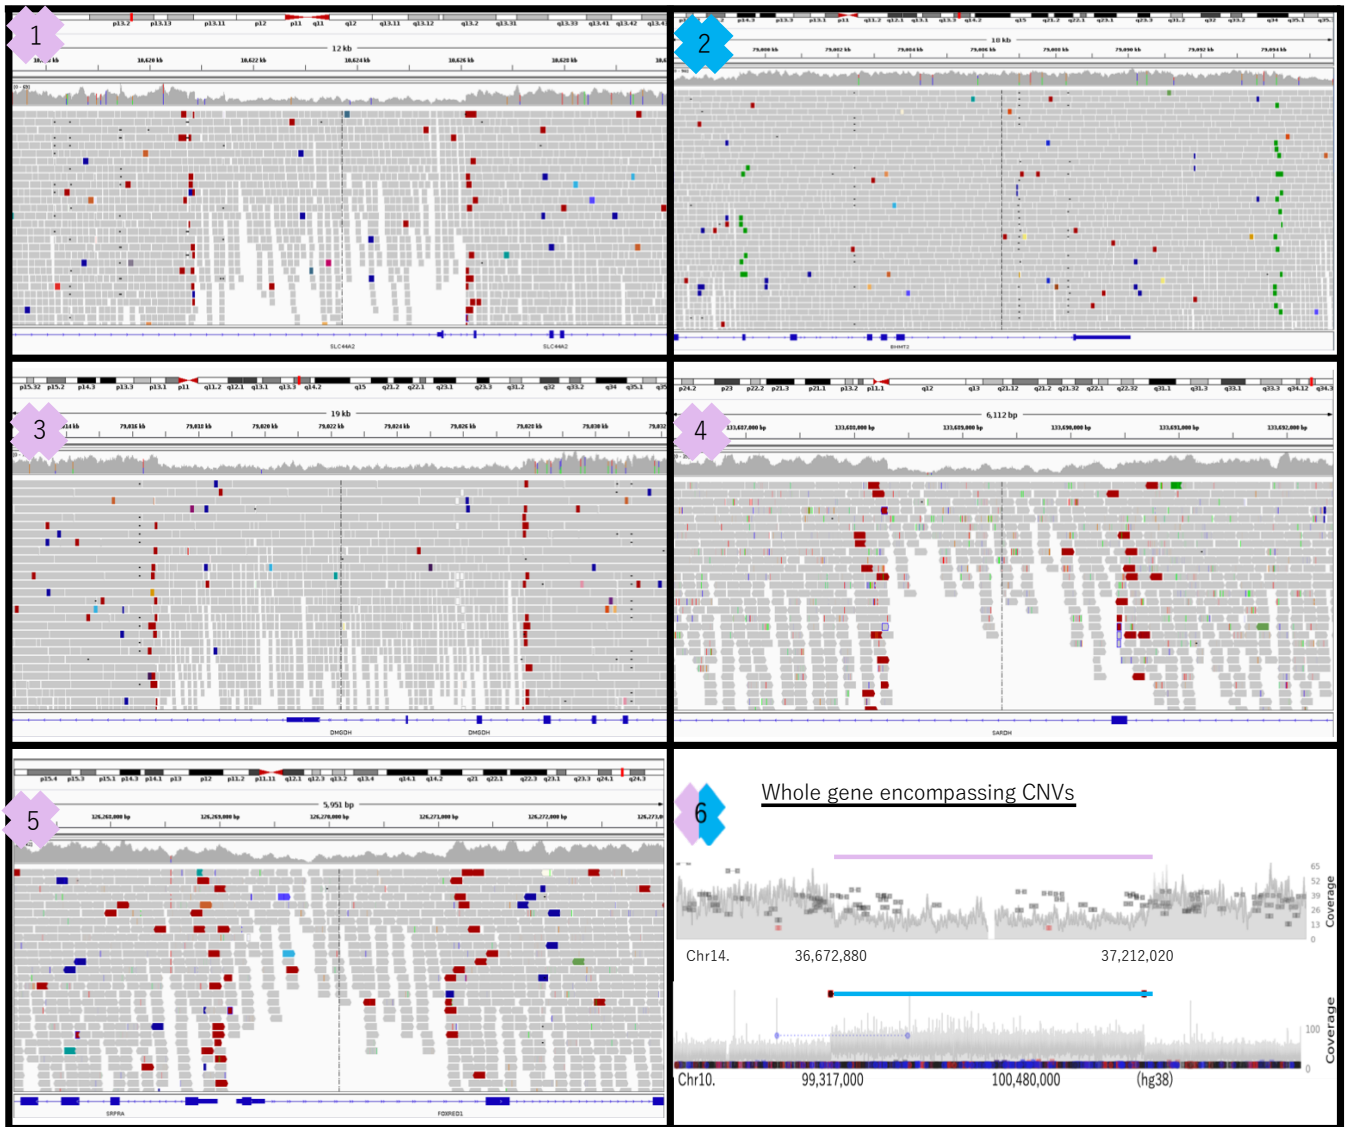

**Supplementary Figure 6. Visual representations of the CNVs highlighted in Figure 5b.** Integrative Genomics Viewer (IGV) images show consistent genomic signatures in the detected CNVs as well as the read information proximal to CNV breakpoints. Labels: 1=SCL44A2; 2=BHMT2; 3=DMGDH; 4=SARDH; 5=FOXRED1. The samplot (labeled 6) displays whole gene encompassing CNVs (deletion=SLC25A21; duplication=SLC25A28). Purple=deletions; blue=duplications.

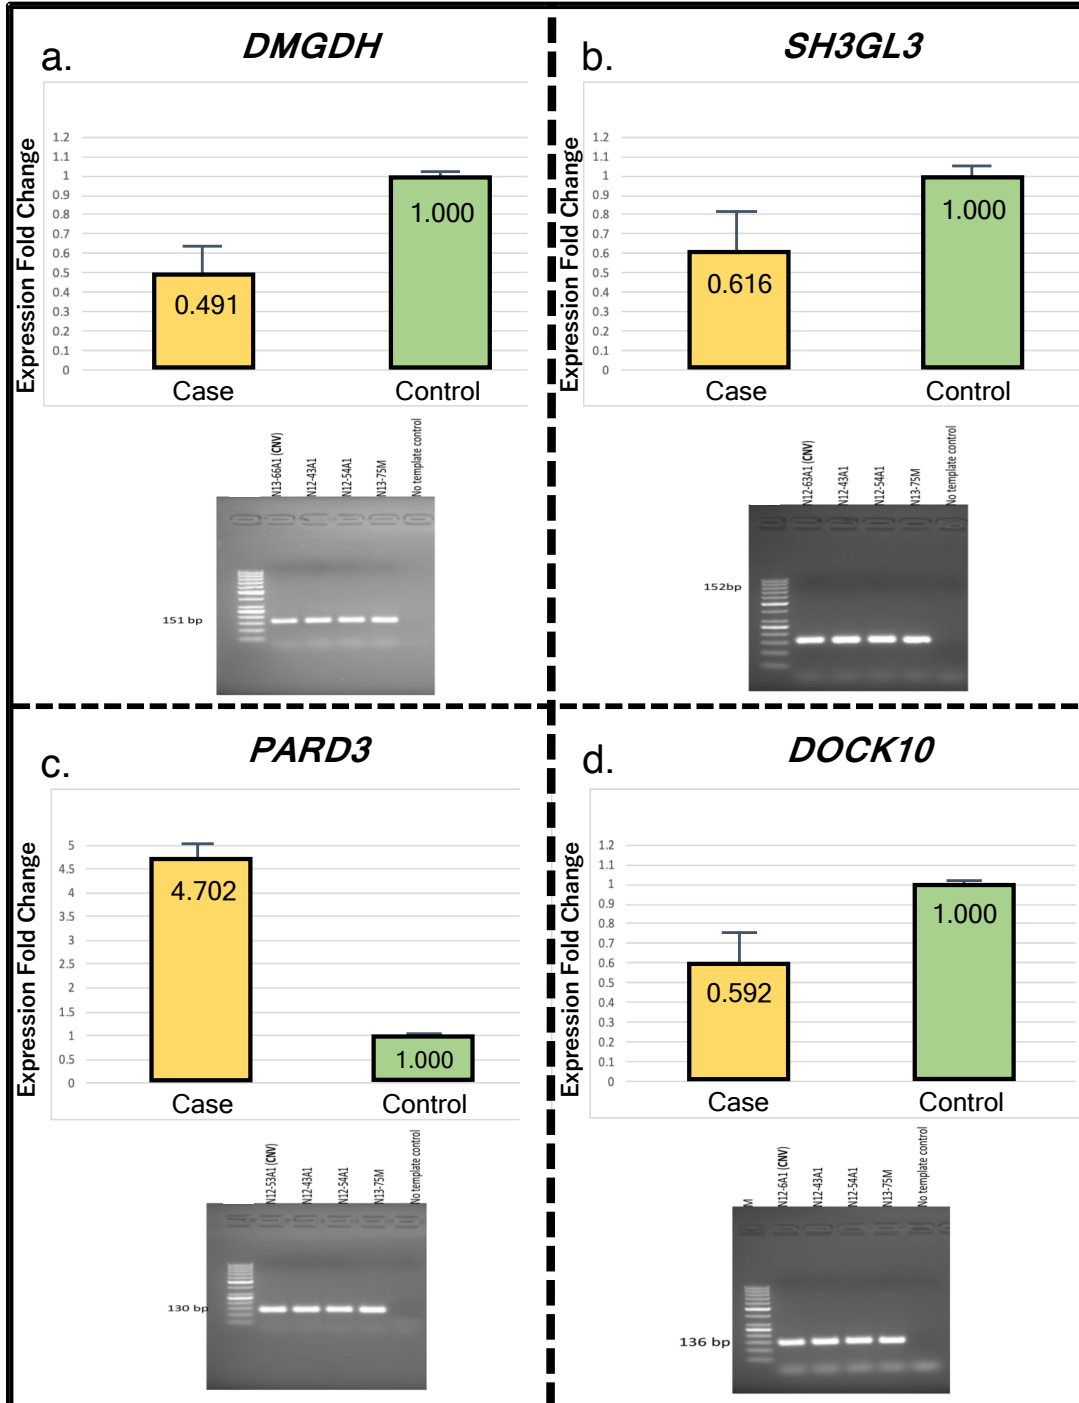

**Supplementary Figure 7. qPCR validation of select rare coding CNVs.** (a-d) Fold change in levels of *DMGDH*, *SH3GL3*, *PARD3* and *DOCK10* compared to three unaffected controls as determined by qPCR. Primer designs are in Suppl. Table 2. All samples were run in triplicate. The fold changes in expression were calculated using the  $2^{-\Delta\Delta CT}$  method and estimates outside of the 1-3 expression fold change range were considered to be CNVs (<1=deletion; >3=duplication).
